# Supplementary material
Source: publisher figshare collection journal article supplement (https://gsajournals.figshare.com/ndownloader/files/24136100)
Supplement: Supplementary file 1 [file 24136100]

## Sheet: Sheet1
Table S2. Mammalian orthologs and disease associations of the 43 genes for which RNAi depletion caused elevated penetrance of Pro phenotype in glp-1(ar202), but not in glp-1(+) in the secondary liquid screen.
Gene Symbol	WormBase ID	Mammalian Ortholog(s)	Mammalian Gene Description	Disease Association
act-1	WBGene00000063	ACTB	actin beta	Baraitser-Winter syndrome; autosomal dominant nonsyndromic deafness 20; non-alcoholic fatty liver disease; temporal lobe epilepsy
arf-1.2	WBGene00000182	ARF1/3	ADP ribosylation factor 1/3	periventricular nodular heterotopia
C23G10.5	WBGene00016012
cct-7	WBGene00020391	CCT7	chaperonin containing TCP1 subunit 7
cdk-12	WBGene00007135	CDK12/13	cyclin dependent kinase 12/13
cri-2	WBGene00019478	TIMP2	TIMP metallopeptidase inhibitor 2	adrenoleukodystrophy; breast cancer; CAKUT2; cystic fibrosis; diabetes mellitus; Down syndrome; endometrial carcinoma; hypertension; Kawasaki disease; obesity; ovarian cancer; pre-eclampsia; preretinal fibrosis; relapsing-remitting multiple sclerosis; renal cell carcinoma; thoracic aortic aneurysm; transitional cell carcinoma; type 1 diabetes mellitus; type 2 diabetes mellitus; Alzheimer's diseas…
daf-1	WBGene00000897	ACVR1C/TGFBR1	activin A receptor type 1C/transforming growth factor beta receptor 1	fibrodysplasia ossificans progressiva; pancreatic cancer; hereditary hemorrhagic telangiectasia; pulmonary hypertension; Ferguson-Smith tumor; Loeys-Dietz syndrome 1; Lynch syndrome; urinary bladder cancer; transient cerebral ischemia; kidney disease; leiomyoma; myocardial infarction; osteochondrodysplasia; arteriovenous malformations of the brain; osteoarthritis; systemic scleroderma
eif-3.F	WBGene00001229	EIF3F	eukaryotic translation initiation factor 3 subunit F	autosomal recessive non-syndromic intellectual disability; type 2 diabetes mellitus
F25B5.3	WBGene00017775	NT5C3A/B	5'-nucleotidase, cytosolic IIIA/B
F53F4.11	WBGene00009993	RSL1D1	ribosomal L1 domain containing 1
F53H1.1	WBGene00018776	DDX46	DEAD-box helicase 46
fib-1	WBGene00001423	FBL	fibrillarin
H06I04.3	WBGene00019168	FTSJ3	FtsJ RNA 2'-O-methyltransferase 3
hda-1	WBGene00001834	HDAC1/2	histone deacetylase 1/2	acute lymphoblastic leukemia; alopecia areata; breast carcinoma; cervix uteri carcinoma in situ; colorectal cancer; multiple sclerosis; pancreatic ductal carcinoma; prostate carcinoma in situ; pulmonary hypertension; type 1 diabetes mellitus; asthma; hepatocellular carcinoma; stomach cancer; temporal lobe epilepsy; alcohol use disorder; anxiety disorder; bronchitis; chronic obstructive pulmonary …
hoe-1	WBGene00001983	ELAC2	elaC ribonuclease Z 2	combined oxidative phosphorylation deficiency 17
iff-2	WBGene00002065	EIF5A2	eukaryotic translation initiation factor 5A2
knl-1	WBGene00002231
mfap-1	WBGene00009671	MFAP1	microfibril associated protein 1
mrpl-28	WBGene00020796	MRPL28	mitochondrial ribosomal protein L28
mrpl-4	WBGene00020717	MRPL4	mitochondrial ribosomal protein L4
nath-10	WBGene00018866	NAT10	N-acetyltransferase 10
nol-2	WBGene00021073	NOP2	NOP2 nucleolar protein
pie-1	WBGene00004027
pkc-3	WBGene00004034	PRKCI/Z	protein kinase C iota/zeta	invasive ductal carcinoma; ovarian carcinoma; hyperglycemia; type 2 diabetes mellitus; abdominal obesity-metabolic syndrome; obesity; type 2 diabetes mellitus
plk-1	WBGene00004042	PLK1	polo like kinase 1	breast carcinoma; endometriosis; ovary epithelial cancer; prostate carcinoma; urinary bladder cancer
prp-31	WBGene00022458	PRPF31	pre-mRNA processing factor 31	retinitis pigmentosa 11
rae-1	WBGene00003803	RAE1	ribonucleic acid export 1
rpl-2	WBGene00004413	RPL8	ribosomal protein L8
rpl-25.1	WBGene00004438	RPL23A	ribosomal protein L23a
rpoa-2	WBGene00008781	POLR1B	RNA polymerase I subunit B
rrbs-1	WBGene00007617	RRS1	ribosome biogenesis regulator 1 homolog
snr-3	WBGene00004916	SNRPD1	small nuclear ribonucleoprotein D1 polypeptide	connective tissue disease; nasopharynx carcinoma; nephritis; proteinuria; systemic lupus erythematosus
spe-5	WBGene00004959	ATP6V1B2	ATPase H+ transporting V1 subunit B2	renal tubular acidosis; autosomal recessive nonsyndromic deafness; enlarged vestibular aqueduct
sptl-3	WBGene00011932	SPTLC2/3	serine palmitoyltransferase long chain base subunit 2/3	hereditary sensory and autonomic neuropathy type 1C; psoriasis
T13H5.4	WBGene00011758	SF3A3	splicing factor 3a subunit 3
T26G10.1	WBGene00012059	DDX47	DEAD-box helicase 47
tbb-1	WBGene00006536	TUBB/TUBB2B/TUBB4B	tubulin beta class I/tubulin beta 2B class IIb/tubulin beta 4B class IVb	complex cortical dysplasia with other brain malformations 6; complex cortical dysplasia with other brain malformations 1; congenital fibrosis of the extraocular muscles; hypomyelinating leukodystrophy 6; torsion dystonia 4; microcephaly
tln-1	WBGene00006771	TLN2	talin 2
W07E6.2	WBGene00021074	NLE1	notchless homolog 1
W09C5.1	WBGene00012351	NSA2	NSA2 ribosome biogenesis factor
xpo-1	WBGene00002078	XPO1	exportin 1
Y45F10D.7	WBGene00012887	WDR36	WD repeat domain 36	glaucoma
ZK430.7	WBGene00022742	DCAF13	DDB1 and CUL4 associated factor 13
